# Supplementary material for: Association of Transanal Total Mesorectal Excision With Local Recurrence of Rectal Cancer
Source: PubMed Central journal article supplement (PMC7859847; doi:10.1001/jamanetworkopen.2020.36330), 2021-02-03
Supplement: jamanetwopen-e2036330-s001.pdf [file jamanetwopen-e2036330-s001.pdf]

## Supplementary Online Content

Caycedo-Marulanda A, Lee L, Chadi SA, et al; Canadian taTME Expert Collaboration. Association of transanal total mesorectal excision with local recurrence of rectal cancer. *JAMA Netw Open*. 2021;4(2):e2036330. doi:10.1001/jamanetworkopen.2020.36330

**eFigure.** Kaplan-Meier curves presenting the probability of being I) local and II) systemic recurrence-free over the course of the study, stratified by disease stage  
**eTable.** Disease free survival (DFS) probability by stage at 24, 36, 48 months

This supplementary material has been provided by the authors to give readers additional information about their work.

eTable

| Stage(Clinical) | Time | DFS probability % |
|-----------------|------|-------------------|
| I               | 24   | 93.8 [89.4, 98.4] |
|                 | 36   | 93.8 [89.4, 98.4] |
|                 | 48   | 89.5 [80.7, 99.2] |
| II              | 24   | 95.2 [91.8, 98.8] |
|                 | 36   | 92.8 [88.1, 97.7] |
|                 | 48   | 87.7 [79.8, 96.4] |
| III             | 24   | 86.8 [82.4, 91.5] |
|                 | 36   | 81.5 [75.4, 88]   |
|                 | 48   | 78.6[70.9,87.2]   |

*Disease Free Survival (DFS) probability by stage at 24,36,48 months*

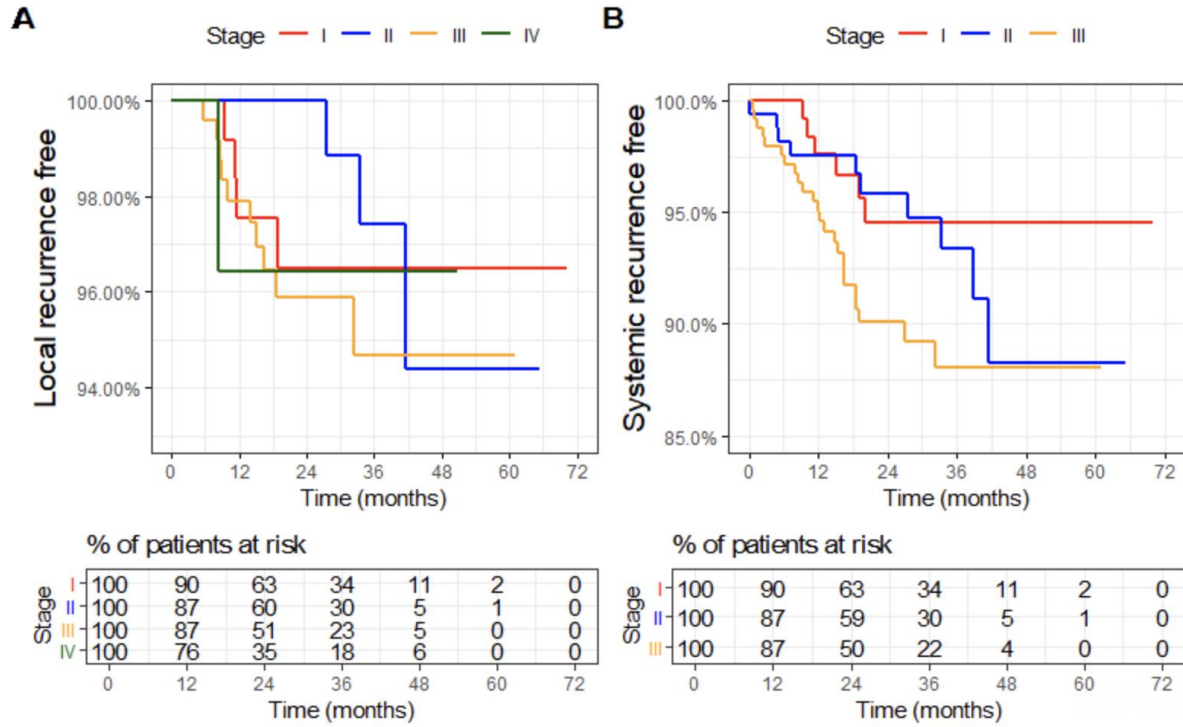

**eFigure** : Kaplan-Meier curves presenting the probability of being I) local and II) systemic recurrence-free over the course of the study, stratified by disease stage; censored patients are indicated by vertical tick marks. Note, patients with disease stage IV were removed prior to the analysis of systemic recurrence.
